1 **Ubiquitin- and ATP-dependent unfoldase activity of**  
2 **P97/VCP•NPLOC4•UFD1L1 is enhanced by a mutation that causes**  
3 **multisystem proteinopathy**

4

5 Emily E. Blythe<sup>a</sup>, Kristine C. Olson<sup>b,1</sup>, Vincent Chau<sup>b</sup>, and Raymond J.  
6 Deshaies<sup>a,c,2</sup>

7

8 <sup>a</sup>Division of Biology and Biological Engineering, California Institute of  
9 Technology, Pasadena CA, 91125; <sup>b</sup>Pennsylvania State University College of  
10 Medicine, Hershey PA, 17033; <sup>c</sup>Howard Hughes Medical Institute, California  
11 Institute of Technology, Pasadena CA, 91125

12

13 <sup>1</sup>Current address: Department of Medicine, Hematology and Oncology, University  
14 of Virginia, Charlottesville VA, 22903

15

16 <sup>2</sup>To whom correspondence should be addressed. Email: [deshaies@caltech.edu](mailto:deshaies@caltech.edu)

## 17 **Abstract**

18

19 p97 is a 'segregase' that plays a key role in numerous ubiquitin-dependent  
20 pathways, such as ER-associated degradation (ERAD). It has been hypothesized  
21 that p97 extracts proteins from membranes or macromolecular complexes to  
22 enable their proteasomal degradation; however, the complex nature of p97  
23 substrates has made it difficult to directly observe the fundamental basis for this  
24 activity. To address this issue, we developed a soluble p97 substrate—Ub-GFP  
25 modified with K48-linked ubiquitin chains—for in vitro p97 activity assays. We  
26 demonstrate for the first time that wild type p97 can unfold proteins and that this  
27 activity is dependent on the p97 adaptor NPLOC4-UFD1L, ATP hydrolysis, and  
28 substrate ubiquitination, with branched chains providing maximal stimulation.  
29 Furthermore, we show that a p97 mutant that causes inclusion body myopathy,  
30 Paget's Disease of bone, and frontotemporal dementia (IBMPFD) in humans  
31 unfolds substrate faster, suggesting that excess activity may underlie  
32 pathogenesis. This work overcomes a significant barrier in the study of p97 and  
33 will allow the future dissection of p97 mechanism at a level of detail previously  
34 unattainable.

35

## 36 **Introduction**

37

38 The AAA ATPase p97, also called valosin containing protein (VCP) or Cdc48 in  
39 yeast, is integral to a wide array of processes in the cell (1, 2). Its role in ER-  
40 associated degradation (ERAD) is the most well-studied, where it functions to  
41 pull misfolded proteins from the ER membrane so they can be degraded by the  
42 proteasome (3). Other degradative pathways with substrates embedded in large  
43 structures, such as ribosome associated degradation (RAD) and mitochondrial  
44 associated degradation (MAD), also rely on the activity of p97 (4–6).  
45 Furthermore, p97 is involved in non-degradative pathways like Golgi and nuclear  
46 envelope reassembly after mitosis and endosomal trafficking (7, 8). The common  
47 mechanism that underlies all of these cellular jobs is presumed to be the

48 extraction and unfolding of ubiquitylated proteins by p97 (9, 10). Its homology to  
49 other AAA ATPases that have demonstrated unfolding activities, such as the  
50 proteasome 19S regulatory particle (11, 12), ClpA (13), and VAT (14, 15), further  
51 support the model of p97 as an unfoldase. While p97 has been shown to extract  
52 proteins from membranes and DNA, its ability to unfold a protein has not been  
53 explicitly demonstrated. Because of this considerable gap in our knowledge, the  
54 biochemical activity that underlies p97's myriad functions remains a mystery.

55

56 Despite our poor molecular understanding of exactly what p97 does and how it  
57 does it, structural studies and indirect assays have provided some insight into  
58 p97 activity. p97 is a homohexamer, with each protomer comprising an N-  
59 domain, two ATPase domains (D1 and D2) stacked one upon the other, and an  
60 unstructured C-terminal tail (16–18). Whereas both ATPase domains are  
61 functional, it is thought that hydrolysis of ATP in D2 is the main driver of  
62 mechanical force and ATP binding in D1 promotes hexamer formation (19–25).  
63 The conformations of the two ATPase domains and the N-domain with respect to  
64 one another are highly cooperative and dependent upon nucleotide binding and  
65 hydrolysis (17, 18, 20, 22, 26–32). Recent high-resolution structural studies show  
66 movement of D2 relative to N-D1 upon ATP binding in D2, while the N domains  
67 move from a coplanar to an axial position with respect to D1 upon ATP binding to  
68 D1 (18). It is unclear how these conformational changes translate to mechanical  
69 force for remodeling protein substrates. Homologues like ClpA function by  
70 threading polypeptides through the central pore (33), and though p97 lacks the  
71 requisite hydrophobic pore residues in D1, other pore residues interact with and  
72 are key to the processing of substrates (19, 34). However, structural studies  
73 imply that the central pore of p97 may be too narrow to accommodate a  
74 polypeptide (16, 18). Other proposed mechanisms include unfolding by D2  
75 through the arginine “denaturation collar” and unfolding outside of the pore by the  
76 movement of the N-domains similar to what has been proposed for NSF (34, 35).  
77 Resolution of the key question of how p97 works has been stymied by the lack of

78 a direct assay to measure the core biochemical activity underlying its segregase  
79 function.

80

81 In performing its biological functions, p97 does not act alone but instead  
82 associates with a set of adaptor proteins that act to recruit or modify substrates  
83 (36). Many of the adaptors contain ubiquitin-binding domains or can add or  
84 remove ubiquitin modifications, thereby linking p97 to ubiquitin signaling (36, 37).  
85 Some adaptors also modulate p97 ATPase activity (38–40). Whereas a few  
86 adaptors have been linked to specific pathways or substrates (41, 8, 42–44), the  
87 functions of others remain unknown (36, 37). The best characterized p97 adaptor  
88 is the heterodimer of NPLOC4/Npl4 and UFD1L/Ufd1 (UN), which recruits  
89 substrates in ERAD and other proteasome-dependent degradative processes  
90 (45–47). NPLOC4 and UFD1L each bind ubiquitin chains, with UFD1L showing  
91 specificity for K48-linked chains (25, 48, 49). They interact with p97 at separate  
92 sites to form a complex with the stoichiometry of one UN heterodimer per p97  
93 hexamer (39, 46, 50–52).

94

95 A significant incentive to gaining a deeper understanding of p97 mechanism of  
96 action is the deep connection between this protein and human disease, and  
97 possibly cancer therapy. Human p97 is mutated in the inherited, autosomal-  
98 dominant multisystem proteinopathy known as IBMPFD (53, 54). In addition, a  
99 small fraction of patients with inherited Amyotrophic Lateral Sclerosis (ALS/Lou  
100 Gehrig's Disease) also carry mutations in p97 that overlap with those seen in  
101 IBMPFD patients (54, 55). However, the mechanism of pathogenesis is not  
102 understood in either case. It has been suggested at various times that  
103 pathogenesis arises from a failure of autophagy, endosomal sorting, clearance of  
104 leaky lysosomes, mitochondrial homeostasis, or mTOR regulation (56, 57, 8, 58–  
105 61). Regardless of the cellular target, the molecular-level defect remains  
106 obscure. It has been suggested that failure of mutant p97 to bind UBXN6/UBXD1  
107 is key (8), but IBMPFD mutants also show increased binding of UN (62). The  
108 mutations that cause IBMPFD all fall within the N-D1 domain interface and affect

109 the relative orientation of these domains (63–66). Moreover, the mutations cause  
110 elevated ATP hydrolysis (20, 63–65, 67), but it has been suggested that this is an  
111 indirect consequence of a decoupling of substrate binding from  
112 mechanochemical transduction in the D2 domain (54, 68). Because p97 is a  
113 hexamer, it has been unclear how to interpret the autosomal dominant nature of  
114 IBMPFD. Is this truly due to enhanced activity, or do the mutations actually cause  
115 reduction-of-function through a dominant-negative mechanism, with mutant  
116 protomers poisoning mixed hexamers? Studies in *Drosophila* support the idea  
117 that the pathogenesis of IBMPFD mutations stems from elevated p97 activity,  
118 resulting in increased processing of TDP-43 (69) and mitofusin (61). As of yet  
119 there remains no biochemical assay that measures p97's presumed core function  
120 of protein unfolding that would enable a direct test of this hypothesis in a defined  
121 system.

122

123 The nature of the majority of known p97 substrates—unstable, scarce, modified  
124 by ubiquitin, and not readily divorced from their contexts—presents challenges  
125 for studying the enzymatic activity of p97 in a systematic manner. A major barrier  
126 to progress has been the absence of a simple, rapid, quantitative assay using  
127 defined components, that can be employed to dissect in detail the mechanism of  
128 action of p97. To address this obstacle, we have developed a soluble,  
129 monomeric p97 substrate. Our substrate is based on a non-cleavable ubiquitin  
130 fusion protein, Ub<sup>G76V</sup>GFP, which is targeted for proteolysis by the Ub fusion  
131 degradation (UFD) pathway (70). Normally, ubiquitin fusions are co-  
132 translationally cleaved by a deubiquitinating enzyme to remove the ubiquitin (71).  
133 However, if the C-terminal glycine is mutated, processing is blocked and the  
134 fusion is rapidly degraded. Previous studies have demonstrated that the  
135 degradation of these non-cleavable Ub fusion proteins, including Ub<sup>G76V</sup>GFP, is  
136 dependent upon p97•UN in human, *Drosophila*, and yeast cells (19, 47, 70, 72).  
137 We show that p97 can unfold Ub<sup>G76V</sup>GFP modified with a K48-linked polyUb  
138 chain and that this reaction is dependent upon the nature of the Ub chain, UN,  
139 and p97 ATPase activity in D2. Our system provides the first direct

140 demonstration of a p97 unfoldase activity that depends on predicted  
141 physiological requirements and will be an invaluable tool for further study of p97  
142 mechanism.

143

## 144 **Results**

145

### 146 **Substrate and assay design**

147

148 We chose to pursue the UFD pathway substrate Ub<sup>G76V</sup>GFP because it is rapidly  
149 degraded in a p97-dependent manner in yeast, *Drosophila*, and human cells (19)  
150 and is a well-behaved protein whose folding state can be easily monitored by  
151 fluorescence. Since p97 substrates are often polyubiquitylated, and p97•UN  
152 binds polyubiquitin (25), we reasoned that Ub<sup>G76V</sup>GFP would need to be  
153 polyubiquitylated to be recognized. To efficiently ubiquitylate it, we developed a  
154 chimera of the RING domain from the E3 ubiquitin ligase gp78 and the E2  
155 enzyme Ube2g2. Prior studies have shown that these enzymes catalyze  
156 formation of K48-linked ubiquitin chains (25). Notably, these two enzymes  
157 function upstream of p97 in ERAD, attesting to the physiological relevance of  
158 using these enzymes to generate a p97 substrate for our assay (73, 74). As  
159 compared to Ube2g2 alone or unfused Ube2g2 with added gp78RING (Fig.  
160 S1A), the gp78RING-Ube2g2 chimera produced unanchored polyUb chains with  
161 very high efficiency (Fig. S1B).

162

163 Using this tool, we employed various strategies to produce three types of  
164 potential p97 substrates. To simplify notation, linearly fused proteins are shown  
165 by dashes, and the length of the K48-linked Ub chain attached to a particular Ub  
166 is shown with a superscript preceding the initiator Ub. First, we aimed to create a  
167 substrate with a short Ub chain of defined length. Although the minimal  
168 requirement for recognition of ubiquitylated proteins by p97 is not known, the  
169 minimum Ub chain length for recognition by the proteasome is four (75).  
170 Therefore, we enzymatically ligated Ub<sub>3</sub>, in which the ubiquitins were joined via

171 K48 linkages and the distal ubiquitin carried a K48R mutation, onto the linearly  
172 fused Ub to form pure  $^{Ub^3}$ Ub-GFP (Fig.1A) (76, 77). Second, to create a  
173 substrate with longer polyubiquitin chains, we built K48-linked chains directly  
174 onto the linearly fused Ub (Fig. 1B). Finally, to produce substrate with branched  
175 Ub chains, we built Ub chains on a base substrate containing two or more  
176 linearly-fused Ub (Ub-Ub-GFP or Ub-Ub-Ub-GFP) (Fig. 1C). Heterogeneous  
177 substrates were fractionated by size exclusion chromatography to enrich for  
178 different chain lengths (Fig. 1D).

179

180 One concern we had was the potential for GFP to refold after being processed by  
181 p97, leaving the assay without an observable endpoint. To address this, we  
182 added an ATPase mutant of the chaperonin GroEL. The GroEL D87K ‘trap’  
183 retains the ability to bind unfolded proteins but can no longer release those  
184 proteins (78). This dead-end complex sequesters unfolded GFP, preventing it  
185 from refolding, and has been used previously to provide assay endpoints for  
186 other unfolding machines (13).

187

### 188 **GFP is unfolded by p97 in an Ub- and UN-dependent manner**

189

190 To explore the unfolding potential of p97, we first compared a set of Ub-GFP  
191 substrates bearing K48-linked ubiquitin chains of varying lengths (Fig. 2A). When  
192 mixed with p97, UN, and GroEL (Fig. S2), Ub-GFP and  $^{Ub^3}$ Ub-GFP showed no  
193 appreciable loss of GFP fluorescence (Fig. 2B). However, Ub-GFP with both  
194 “medium” (>4 Ub,  $^{Ub^M}$ Ub-GFP) and “long” (>12 Ub,  $^{Ub^L}$ Ub-GFP) ubiquitin chains  
195 showed a modest decrease in fluorescence over time (~30%, Fig. 2B). Whereas  
196  $^{Ub^L}$ Ub-GFP did show improved unfolding relative to  $^{Ub^M}$ Ub-GFP, the difference  
197 was quite small (~5% signal loss).

198

199 We examined further the requirements for p97-dependent unfolding using  $^{Ub^L}$ Ub-  
200 GFP, since this substrate gave the largest signal. When incubated with only p97  
201 or p97 and GroEL, no unfolding was observed (Fig. 2C). A similar result was



202 obtained when UN was replaced with NSFL1C/p47 or UBXN7/UBXD7, p97  
203 adaptors involved in Golgi reassembly after mitosis (41) and regulation of cullin-  
204 RING Ub ligases (37, 43, 79), respectively, despite both of these adaptors  
205 binding to p97 and substrate (Fig. S3). Therefore, UN is required for p97-  
206 catalyzed unfolding, and it cannot be replaced by other adaptors. Additionally,  
207 GroEL was essential to provide an endpoint for the assay. Fluorescence loss  
208 was amplified by the addition of GroEL (Fig. 2C), indicating GFP was able to  
209 refold to some degree after processing by p97•UN. However, GroEL did not  
210 unfold substrate on its own (Fig. 2C), and immunoprecipitation of GroEL showed  
211 that p97•UN was required for GroEL interaction with substrate (Fig. 2D).  
212 Unfolding of substrate by p97 was also highly temperature dependent, with the  
213 rate and extent of unfolding increasing between 22-42 °C (Fig. S4).

214

215 We found it curious that  $\leq 40\%$  of the fluorescence signal of  $^{UbL}Ub$ -GFP was  
216 typically lost in our unfolding assays even though all components of the system  
217 were at or very near saturation (Fig. S5), suggesting that there was another  
218 factor influencing substrate competence that remained to be discovered. Three  
219 Ub binding sites with different chain linkage preferences are available on p97•UN  
220 (25). Therefore, we tested whether substrates carrying branched Ub chains  
221 would be more effectively unfolded, because a branch would enable two  
222 separate ubiquitin chains to be elaborated from a single attachment point (in this  
223 case, Met1 of GFP). As a proxy for Ub chains with branched linkages, we  
224 expressed Ub-GFP fused to one or more additional ubiquitins in tandem and  
225 used these proteins as substrates for subsequent enzymatic polyubiquitylation  
226 (Fig. 3A). Interestingly, a substrate in which K48-linked polyubiquitin chains were  
227 polymerized on Ub-Ub-GFP ( $^{UbM}Ub$ - $^{UbM}Ub$ -GFP) showed significant improvement  
228 in unfolding by p97 as compared to  $^{UbM}Ub$ -GFP (Fig. 3B) despite the latter having  
229 a greater amount of ubiquitin conjugation as judged by mobility upon SDS-PAGE  
230 (Fig. 3A, lanes 1 and 2). Neither further extension of the chains to form  $^{UbL}Ub$ -  
231  $^{UbL}Ub$ -GFP nor use of a triubiquitin fusion significantly increased the rate or  
232 extent of unfolding (Fig. 3B). Although we cannot directly visualize ubiquitin



233 chains branching from each ubiquitin in the Ub-Ub-GFP fusion protein, reactions  
234 run with Ub-K48R indicate that both Ub moieties were efficiently conjugated with  
235 ubiquitin under our reaction conditions (Fig. S6). Incidentally, this same reaction  
236 confirms the linkage specificity of our Ube2g2-gp78 E2-E3 chimera. Taken  
237 together, our data suggest that the physical arrangement of the Ub chains is  
238 important for unfolding by p97•UN, with the enzyme preferring substrates with at  
239 least one branch point that enables nucleation of more than one chain of K48-  
240 linked ubiquitins.

241

### 242 **Substrate unfolding is dependent upon ATP hydrolysis and stimulates p97** 243 **ATPase activity**

244

245 Next we examined the energy-dependence of p97-catalyzed unfolding. <sup>UbL</sup>Ub-  
246 <sup>UbL</sup>Ub-GFP was not unfolded by p97 in the absence of nucleotide, and ADP or  
247 the nonhydrolyzable ATP analog ATPγS could not substitute for ATP (Fig. 4A).  
248 Two p97 ATPase inhibitors, the allosteric inhibitor NMS-873 (80) and the D2-  
249 specific, ATP-competitive inhibitor CB-5083 (81), also prevented ATP-dependent  
250 substrate processing (Fig. 4A). p97 with a D1 domain Walker B motif mutation  
251 (p97-E305Q) that blocks nucleotide hydrolysis but not binding exhibited only mild  
252 defects in substrate unfolding. By contrast, the same mutation in D2 (p97-  
253 E578Q) completely abolished unfoldase activity (Fig. 4B; Table 1). Together,  
254 these data demonstrate that ATP hydrolysis in D2 powers the unfolding of  
255 substrate by p97•UN.

256

257 Some adaptors modulate p97 ATPase activity (38), so we examined the effects  
258 of substrate processing on the hydrolysis of ATP by p97 and p97•UN. Addition of  
259 long unanchored K48-linked ubiquitin chains (<sup>UbL</sup>Ub), Ub-GFP, <sup>Ub3</sup>Ub-GFP or  
260 <sup>UbL</sup>Ub-<sup>UbL</sup>Ub-GFP did not alter the ATPase activity of p97 (Fig. S7A). Whereas  
261 UN did not significantly affect the ATPase activity of p97, the further addition of  
262 <sup>UbL</sup>Ub-<sup>UbL</sup>Ub-GFP stimulated ATP hydrolysis by ~4-fold, whereas Ub-GFP and  
263 <sup>Ub3</sup>Ub-GFP had no effect (Fig. 4C). The latter result is consistent with the inability

264 of p97•UN to unfold Ub-GFP or <sup>Ub3</sup>Ub-GFP. Neither NSFL1C nor UBXN7  
265 supported substrate-triggered acceleration of p97 ATP hydrolysis (Fig. S7B).  
266 Long, unanchored Ub chains also stimulated p97 ATPase activity to a similar  
267 degree as <sup>UbL</sup>Ub-<sup>UbL</sup>Ub-GFP, suggesting that p97 interaction with Ub chains and  
268 not the GFP substrate itself was both necessary and sufficient for the observed  
269 acceleration. In agreement with the unfolding results, the residual ATPase  
270 activity of p97-E578Q was unaffected by substrate plus UN (Fig. 4D). However,  
271 p97-E305Q, which was able to unfold substrate, was also not stimulated by  
272 substrate, even showing a slight decrease in ATPase activity (Fig. 4D). The  
273 E305Q mutant also showed higher basal ATPase activity than WT, as has been  
274 seen before in steady-state experiments (20). These results suggest that there is  
275 a high degree of crosstalk between ATPase activity in D1 and D2, and whereas  
276 ATP hydrolysis in D2 is the driving force for unfolding, D1 activity is also needed  
277 for substrate-induced ATPase acceleration.

278

### 279 **UN recruits substrate to p97**

280

281 The tight correlation between the competence of a substrate to be unfolded and  
282 its ability to accelerate ATP hydrolysis suggests that binding of substrate to p97  
283 may stimulate ATPase activity, leading to substrate unfolding. To further probe  
284 this hypothesis, we evaluated binding of substrate to p97. Immunoprecipitation of  
285 p97 showed that it bound <sup>UbL</sup>Ub-<sup>UbL</sup>Ub-GFP substrate in the presence but not in  
286 the absence of UN (Fig. 5A, lanes 4 and 5). Reciprocal immunoprecipitation of  
287 GFP confirmed that substrate bound UN in the absence of p97 but did not bind  
288 p97 in the absence of UN (Fig. 5B). Furthermore, the interaction between p97  
289 and UN appeared to be stabilized by substrate binding (Fig. 5A, lanes 3 and 5).  
290 We also analyzed substrate dependence of GroEL association with p97, but  
291 observed high background binding to our beads even in the absence of antibody  
292 (lane 1). The binding signal was increased in lanes 6 and 7, but this could be due  
293 to p97, which in our experience is prone to exhibit non-specific binding.

294

295 Whereas the unfolding of substrate was highly dependent on ATP hydrolysis,  
296 substrate interaction with p97 was not. Immunoprecipitation of <sup>FLAG-Ub<sup>L</sup>Ub-FLAG-</sup>  
297 <sup>Ub<sup>L</sup>Ub-GFP</sup> pulled down equal amounts of p97 in the absence of added  
298 nucleotide and in the presence of ATP, ATPγS, ATP plus NMS-873, and ATP  
299 plus CB-5083 (Fig. 5C). Therefore, p97 does not have to be actively remodeling  
300 substrate in order to effectively form a tight complex. Loss of binding of p97, but  
301 not UN, was seen only with added ADP, which could be due to the large  
302 conformational changes observed for p97 in its ADP-bound state (18) (Fig. 5C).  
303 These results are consistent with previous studies on Ub chain association with  
304 p97 and p97•UN (48, 82).

305

### 306 **IBMPFD mutant p97-A232E has enhanced unfoldase activity**

307

308 The autosomal dominant human syndrome IBMPFD is caused by mutations that  
309 cluster at the interface of the N and D1 domains of p97. Of the different IBMPFD  
310 mutations that have been identified in p97, A232E exhibits the most severe  
311 phenotype in terms of age of onset and penetrance. In addition, p97-A232E  
312 consistently shows higher basal D2 ATPase rates than wild-type enzyme (20, 63,  
313 65). The availability of an assay that directly measures ATP-dependent unfolding  
314 by p97 allowed us to distinguish between two alternative interpretations of the  
315 significance of the enhanced ATPase activity of the A232E mutant protein. On  
316 the one hand, the enhanced activity may reflect a true gain-of-function wherein  
317 p97-A232E is either a more powerful or faster motor. On the other hand, ATPase  
318 activity may increase because of decoupling of the D2 “motor” from the substrate  
319 “load”, analogous to pushing in the clutch when an engine is revving in low gear.  
320 If the former is more accurate we would expect to see increased unfolding by the  
321 mutant protein. Conversely, if the latter is correct, we would expect to see  
322 reduced unfolding. The result of this experiment was unambiguous: p97-A232E  
323 exhibited accelerated unfolding of GFP under the single-turnover conditions used  
324 in the assay (Fig. 6A, Table 1). This effect is reproducible, because in two  
325 independent sets of preparations, p97-A232E displayed faster unfolding than WT

326 p97 (Fig. 6A and Fig. 6C). The substrate-induced ATPase acceleration observed  
327 for WT p97 was also observed with p97-A232E (Fig. 6B). The mutant protein  
328 displays an increased basal rate of ATP hydrolysis and a higher rate in the  
329 presence of substrate compared to WT.

330

331 We identified a reversible, ATP-competitive p97 ATPase inhibitor that was  
332 recently perfected to yield the clinical candidate CB-5083 (81), which is in human  
333 phase 1 clinical trials for treatment of cancer. If the basis of IBMPFD pathology is  
334 due to enhanced unfoldase activity of p97, we reasoned that CB-5083 could  
335 potentially be explored as a therapy for IBMPFD. To test the feasibility of this  
336 idea, we performed unfolding reactions with p97-A232E at several different  
337 concentrations of CB-5083. Remarkably, when added at 37.5 nM, or 1 molecule  
338 per 2 p97 hexamers, CB-5083 normalized the unfolding rate of p97-A232E to  
339 match that of WT (Fig. 6C).

340

## 341 **Discussion**

342

343 P97/VCP is implicated in a broad range of cellular processes including  
344 membrane fusion, protein trafficking, and ubiquitin-dependent proteolysis (1). It is  
345 thought that the core biochemical activity of p97 that enables its diverse  
346 biological functions is its ability to act as a 'segregase' that segregates  
347 polypeptides from binding partners in multisubunit complexes, or from large  
348 macromolecular structures including ribosomes, membranes, or chromatin.  
349 Although the mechanism by which p97 exerts segregase activity is not known,  
350 the most economical hypothesis is that it grabs onto the polypeptide to be  
351 segregated and commences to unfold it. However, despite the appeal of this  
352 unifying hypothesis, the ability of wild type p97 to harvest the energy of ATP  
353 hydrolysis to unfold a polypeptide has never been directly demonstrated. We  
354 show here for the first time, and in a well-defined system, that wild type p97 can  
355 at least partially unfold a protein. In contrast to prior studies that employed a  
356 doubly-mutated p97 acting upon an unmodified protein in the absence of any

357 adaptor (83, 84), the unfolding we observe exhibits dependencies predicted from  
358 prior genetic and biochemical studies of p97, including dependence on ATP  
359 hydrolysis by the D2 ATPase domain of p97, the heterodimeric adaptor  
360 NPLOC4•UFD1L, and conjugation of an ubiquitin chain to the substrate that is  
361 unfolded (1, 24, 25).

362

363 Despite the close alignment of in vitro dependencies reported here with known in  
364 vivo requirements for p97 action, there are two caveats worth noting. First, we do  
365 not know whether the loss of GFP fluorescence is due to complete unfolding or  
366 local unfolding. Second, our Ub-GFP model substrate is not a native substrate of  
367 p97. However, p97 activity in the UFD pathway is absolutely required for its  
368 degradation in vivo in yeast, *Drosophila*, and human cells (19, 47, 70, 72), and  
369 the E2–E3 chimera employed to ubiquitylate Ub-GFP was derived from enzymes  
370 that function directly upstream of p97 in the ERAD pathway (73). Thus, we  
371 believe the reaction reported here represents the essence of p97's biochemical  
372 activity that underlies its physiological functions.

373

374 Processing of our Ub-GFP substrate by p97 is dependent on the conjugation of  
375 multiple ubiquitins connected by K48 linkages, which is consistent with reports of  
376 K48-linked Ub chain binding by p97 and UFD1L and linkage-nonspecific chain  
377 binding by NPLOC4 (25, 48, 49, 82). One of our most interesting findings is that  
378 we observed enhanced substrate unfolding when the substrate contained a  
379 branch point enabling the formation of multiple K48-linked ubiquitin chains. Our  
380 substrate contains a branch at the base of the ubiquitin conjugate, which allows  
381 for two K48-linked chains to be built on a single site of substrate modification.  
382 Because there are multiple Ub binding sites on the p97•UN complex, the  
383 branched chain on our  $^{UbL}Ub-^{UbL}Ub$ -GFP substrate may retard, via enhanced  
384 avidity, its dissociation prior to unfolding. Branched Ub chains can enhance  
385 substrate degradation (85) and have been associated with p97 previously.  
386 Ubiquitin chains with K11 linkages are associated with multiple p97 adaptor  
387 proteins (37) and are implicated in ERAD (86). Substrates modified with K11 and

388 K11-K48 branched chains associate with p97•UN and its *Drosophila* ortholog (87,  
389 88), and p97 binds K11-K48 branched chains better than either type of  
390 homotypic chain (85). Furthermore, both K29 and K48 linkages are formed on  
391 UFD pathway substrates in vivo and in vitro using purified UFD pathway  
392 enzymes (47, 89). Whereas our data with linear ubiquitin fusions suggest  
393 branched and/or multiple ubiquitin chains may be important for interaction of  
394 substrates with p97•UN, further work with physiological linkages in vitro and in  
395 vivo is needed to determine the exact requirements for ubiquitylated p97  
396 substrates.

397

398 The second requirement for p97-catalyzed unfolding is the heterodimeric adaptor  
399 UN. In agreement with prior work, UN bridges the interaction of substrates with  
400 p97 (25, 48). However, p97 also associates with other adaptor proteins, some of  
401 which (e.g. UBXN7) can co-bind with UN and others (e.g. NSFL1C) which bind in  
402 a mutually exclusive manner (36, 37, 46, 90, 91). Although there are examples of  
403 processes that require both UN and an additional adaptor (42, 92), in general it is  
404 unclear whether the different adaptors work in different pathways, or work  
405 sequentially, together, or in opposition to one another in the same pathway.  
406 Mutually exclusive adaptors like NSFL1C bind very differently from UN yet also  
407 promote protein segregation (41, 51, 93). However, neither NSFL1C nor UBXN7  
408 was able to replace UN in our unfolding assay, suggesting they promote  
409 substrate processing in a different way or work on different substrates. Our assay  
410 provides the first platform for further mechanistic exploration of the functional  
411 relationship between different adaptor proteins.

412

413 The final requirement for unfolding of GFP is ATP hydrolysis by the D2 ATPase  
414 of p97. Our results are in direct contrast with a previous study which showed that  
415 p97-dependent unfolding is inhibited by ATP (94), but are consistent with  
416 overwhelming in vitro and in vivo data (1, 23, 25, 34). Our experiments with p97  
417 mutants and the D2-specific ATP-competitive inhibitor CB-5083 demonstrate the  
418 importance of D2 ATPase activity over that of D1, which confirms prior



419 observations (19–25). We observed very little effect of the D1 Walker B mutant  
420 on substrate processing, leaving the role of D1 ATPase activity in p97 function  
421 unclear (1). Not only is the ATPase activity key to substrate processing but we  
422 also observe its stimulation by Ub chain or substrate binding. This stimulation  
423 was abolished in the D1 Walker B mutant. Nevertheless, this mutant unfolded  
424 GFP at near-WT rates, suggesting that substrate stimulation of ATP hydrolysis  
425 might not be essential, at least for some substrates. ATPase acceleration in the  
426 presence of the cytoplasmic fragment of the ERAD substrate Sytl has been  
427 previously reported, but unlike the stimulation reported here, it was not  
428 dependent upon UN or ubiquitylation of the substrate (34), both of which are  
429 thought to be requirements for ERAD. p97 can interact both with a substrate and  
430 the Ub chain appended to the substrate (25, 95), suggesting that stimulation of  
431 p97 ATPase and perhaps substrate processing can be regulated through multiple  
432 binding interfaces. Though we are unable to draw any conclusions about the  
433 mechanism of unfolding by p97, studies on the archaeobacterial homolog VAT  
434 support a model whereby substrate is translocated through the central channel  
435 (14, 15), suggesting that adaptor and substrate engagement must expand p97's  
436 narrow pore (16, 18) to accommodate the threading of an unfolded polypeptide  
437 chain.

438

439 Mutations in p97 cause the autosomal dominant human disease IBMPFD (53).  
440 Prior work has led to conflicting proposals regarding the underlying basis for  
441 pathogenesis in IBMPFD. On the one hand, some studies have emphasized a  
442 reduction in specific biological functions of the mutant p97, including its roles in  
443 endosomal trafficking, autophagy, and elimination of leaky lysosomes (56, 8, 60).  
444 Defects in these processes have been linked to reduced binding of mutant p97 to  
445 UBXD1 (8). On the other hand, IBMPFD mutant proteins hydrolyze ATP at a  
446 faster rate (20, 63–65). Whereas it has been speculated that the increase in ATP  
447 hydrolysis might be due to an uncoupling of substrate binding via the N domain  
448 to mechanochemical transduction in the D2 domain (54, 68), studies in  
449 *Drosophila* point to an increase in function for the mutant p97 (61, 67, 69).



450 Furthermore, the overexpression of WT p97 enhanced IBMPFD mutant  
451 phenotypes while inactivation of one copy of WT p97 suppressed mutant  
452 phenotypes, which is consistent with a gain-of-function mutation (96). The  
453 availability of a biochemical assay that directly measures substrate unfolding,  
454 which we propose is the core biochemical activity underlying p97's myriad  
455 biological functions, allowed us to investigate this issue. We focused on the  
456 mutant with the most severe disease phenotype, p97-A232E, and observed a  
457 modest but reproducible increase in the rate of substrate unfolding that was re-  
458 normalized by addition of an ATP-competitive inhibitor, implying that the  
459 underlying defect in this disease may be due, in part, to a true gain-of-function  
460 rather than the prevailing loss-of-function hypothesis. Our results call to mind  
461 previous work to engineer Hsp104, in which point mutations greatly augmented  
462 its ATPase and unfoldase activity while altering intersubunit communication (97).  
463 It is interesting that the increased ATPase activity of p97-E305Q did not cause a  
464 similar increase in unfolding rate, suggesting that the rate of ATP hydrolysis in  
465 D2 does not by itself determine the rate of unfolding. Our experiments were  
466 carried out with pure WT and pure mutant p97, so it will be of interest to study  
467 populations of mixed hexamers of A232E and other IBMPFD mutants, to better  
468 recapitulate the situation that pertains in vivo. Whereas much clearly remains to  
469 be done to further investigate this gain-of-function model, if our proposal is  
470 correct it implies that the clinical-grade p97 inhibitor (81) that renormalized the  
471 activity of the mutant protein may be useful for therapy of IBMPFD and ALS  
472 cases that arise from mutation of p97.

473

## 474 **Methods**

475

### 476 **Protein and expression purification**

477 A description of the construction, expression and purification of novel reagents is  
478 described below. A description of previously published proteins used in this study  
479 can be found in Table S1.

480

## 481 **gp78RING-Ube2g2 chimera construction and purification**

482 A 72-residue sequence of the E3 ubiquitin protein ligase gp78/AMFR (residues  
483 322 to 393), containing the RING domain, was fused to the N-terminus of the  
484 ubiquitin-conjugating enzyme Ube2g2 with a linker sequence of GTGSH. cDNA  
485 encoding this fusion protein was inserted into the bacterial expression plasmid  
486 p28a-TEV vector to encode a polyHis-tagged protein. Protein was expressed in  
487 BL21(DE3) at 37 °C with 0.4 mM IPTG for 4 hours and was purified on Ni-NTA  
488 resin and a Superdex 75 column before being cleaved with TEV protease  
489 overnight at 4 °C. Cleaved protein was then bound to a MonoQ ion exchange  
490 column, eluted with a NaCl gradient (0.05 – 0.5 M), concentrated with centrifugal  
491 filter units, and flash frozen.

492

## 493 **Ub<sup>G76V</sup>GFP fusion construction**

494 The coding sequence for Ub<sup>G76V</sup>GFP in the EGFP-N1 vector (RDB# 1832) (19)  
495 was PCR amplified and inserted into pET28a using NdeI and NotI sites to  
496 produce His<sub>6</sub>-Ub<sup>G76V</sup>-GFP (RDB# 3006). His<sub>6</sub>-Ub<sup>G76V</sup>- Ub<sup>G76V</sup> GFP (RDB# 3344)  
497 and His<sub>6</sub>-Ub<sup>G76V</sup>-Ub<sup>G76V</sup>-Ub<sup>G76V</sup> -GFP (RDB# 3345) were created by ligating  
498 Ub<sub>2</sub><sup>G76V</sup> and Ub<sub>3</sub><sup>G76V</sup>, PCR amplified from a synthetic Ub<sub>4</sub><sup>G76V</sup> sequence (RDB#  
499 2406), into His-Ub<sup>G76V</sup>-GFP cut with NdeI and HindIII. For simplification, the  
500 G76V notation has been left out of subsequent mentions of these constructs.

501

## 502 **Ub<sub>3</sub>Ub-GFP synthesis and purification**

503 A plasmid for bacterial expression of Ub-K48R (RDB# 3348) was made from that  
504 of Ub (RDB# 2805) by site-directed mutagenesis, and the protein was expressed  
505 as previously described (76). Pure K48-linked Ub<sub>3</sub> chains carrying a K48R  
506 mutation in the distal Ub were enzymatically synthesized and purified as  
507 described previously (76, 77). To form Ub<sub>3</sub>Ub-GFP, 0.5 μM Ube1 (E1), 5 μM  
508 gp78RING-Ube2g2, 2.5 μM Ub-GFP, and 5 μM Ub<sub>3</sub> were incubated in 20 mM  
509 Hepes pH 7.4, 5 mM ATP, and 5 mM MgCl<sub>2</sub> overnight at 37 °C. The Ub<sub>3</sub>Ub-GFP  
510 was then purified on Ni-NTA resin and a Superdex 200 gel filtration column  
511 before being concentrated with centrifugal filter units and flash frozen.

512

### 513 **Polyubiquitylated substrate synthesis and purification**

514 Reactions were carried out with final concentrations of 10  $\mu$ M Ub-GFP fusion  
515 protein, 1  $\mu$ M E1, 20  $\mu$ M gp78RING-Ube2g2, and 400  $\mu$ M ubiquitin in 20 mM  
516 Hepes pH 7.4, 10 mM ATP, and 10 mM  $MgCl_2$  at 37 °C overnight. Ubiquitin was  
517 added progressively in small amounts over the first eight hours of the reaction.  
518 For FLAG-tagged substrate, 40  $\mu$ M FLAG-Ubiquitin (Boston Biochem,  
519 Cambridge, MA, USA) was added in the first two hours. To purify ubiquitylated  
520 GFP from free ubiquitin chains, the reaction mixture was incubated with Ni-NTA  
521 resin, eluted with 300 mM imidazole, and run over a Superose 6 size exclusion  
522 column in 20 mM Hepes, pH 7.4, 250 mM KCl, 1 mM  $MgCl_2$ , 1 mM TCEP and  
523 5% glycerol. Fractions were pooled into long, medium, and short chain length  
524 samples, concentrated with centrifugal filter units, and flash frozen.

525

### 526 **ATPase assays**

527 The ATPase assay protocol was modified from previously published methods  
528 (40). In an untreated microplate (#655101, Greiner Bio-One, Kremsmünster,  
529 Austria), 40  $\mu$ L solutions containing 30 nM p97 hexamer, 150 nM adaptor, and/or  
530 150 nM substrate in ATPase assay buffer (25 mM Hepes pH 7.4, 100 mM KCl, 3  
531 mM  $MgCl_2$ , 1 mM TCEP, 0.1 mg/mL ovalbumin) were preincubated at 37 °C for  
532 10 minutes. To this, 10  $\mu$ L of a 1 mM ATP solution was added, and the reaction  
533 was incubated at 37 °C for 5 or 10 minutes. After cooling on ice for 30 seconds,  
534 50  $\mu$ L of BIOMOL Green reagent (Enzo Life Sciences, Farmingdale, NY, USA)  
535 was added. Solutions were developed at room temperature for 30 minutes before  
536 being read at 600 nm. The amount of inorganic phosphate in each sample was  
537 calculated from a standard curve, and relative ATPase activity for a sample was  
538 calculated by normalizing its measurement to that of samples of WT p97 alone.

539

### 540 **Fluorescence unfolding assays**

541 Unless specified, all assays were carried out at 37 °C. Samples contained 25 nM  
542 GFP substrate, 75 nM p97 hexamer, 150 nM adaptor (UN, NSFL1C or UBXN7),

543 and/or 250 nM GroEL trap in unfolding assay buffer (25 mM Hepes pH 7.4, 100  
544 mM KCl, 5 mM MgCl<sub>2</sub>, 1 mM TCEP, 2 mM ATP). Control experiments indicated  
545 that the levels of p97, adaptor, and GroEL used were at or near saturation  
546 (Figure 2—figure supplement 4). Other nucleotides and p97 inhibitors were  
547 present at 2 mM and 10 μM, respectively, when indicated. Kinetic experiments  
548 were carried out on a Fluoro-Log 3 (Horiba Jobin Yvon, Edison, NJ, USA) with  
549 excitation at 488 nm and emission at 509 nm. Relative fluorescence was  
550 calculated by normalizing the fluorescence signal to that at time zero. Unfolding  
551 rates were calculated by fitting curves to an exponential decay model in Prism  
552 (GraphPad, San Diego, CA, USA).

553

### 554 **Binding assays**

555 Antibodies used for immunoprecipitation and western blotting are listed in Table  
556 S2. Samples containing 100 nM p97, 200 nM UN, 200 nM GFP substrate, and/or  
557 200 nM GroEL trap in binding assay buffer (25 mM Hepes pH 7.4, 100 mM KCl,  
558 3 mM MgCl<sub>2</sub>, 1 mM TCEP) in a volume of 200 μL were preincubated at 37 °C for  
559 15 minutes. Triton X-100 interfered with binding of substrate to GroEL trap, so  
560 0.01% Triton X-100 was included in all buffers only in reactions that did not  
561 contain GroEL. Nucleotides and inhibitors were present at 2 mM and 10 μM,  
562 respectively, where indicated. For IPs using Protein G magnetic beads (Bio-Rad  
563 Laboratories, Hercules, CA, USA), protein mixtures were incubated with 1 μL of  
564 antibody for 15 minutes at 37 °C prior to a 1 hour incubation with 25 μL of beads  
565 at room temperature. For FLAG IPs, reactions were incubated with 25 μL of anti-  
566 FLAG resin (Sigma-Aldrich, St. Louis, MO, USA) for 15 minutes at room  
567 temperature. Following incubation, all beads were washed 3 times with 750 μL  
568 assay buffer before being boiled in 50 μL 2X SDS-PAGE loading dye. Samples  
569 were then analyzed by western blot.

570

### 571 **Acknowledgements**

572

573 We thank Willem den Besten, David Sherman, and Jing Li for assistance with  
574 cloning and protein purification, Arthur Horwich for the GroEL expression plasmid  
575 and antibody, Rati Verma and David Sherman for comments on the manuscript,  
576 and the entire Deshaies lab for helpful discussion. We also thank Tom Rapoport  
577 for communicating results prior to publication. Fluorescence measurements were  
578 carried out in the Beckman Institute Laser Resource Center and the Caltech  
579 Biophysical Facility. R.J.D. is an Investigator of the HHMI and this work was  
580 supported by HHMI.

581

## 582 **Competing interests**

583

584 RJD: RJD is also a founder, consultant, member of the SAB, and shareholder of  
585 Cleave Biosciences, which is developing CB-5083 for therapy of cancer. The  
586 other authors declare that no competing interests exist.

587

## 588 **Author contributions**

589

590 EEB designed, performed, and interpreted all experiments related to p97, and  
591 drafted and edited the manuscript; KCO designed and characterized gp87RING-  
592 Ube2g2 and edited the manuscript; VC assisted in the design and  
593 characterization of gp78RING-Ube2g2 chimera and edited the manuscript; RJD  
594 assisted in the design and interpretation of all experiments related to p97, and  
595 drafted and edited the manuscript.

596

## 597 **References**

598

- 599 1. Chapman E, Fry AN, Kang M (2011) The complexities of p97 function in  
600 health and disease. *Mol Biosyst* 7(3):700–710.
- 601 2. Wang Q, Song C, Li C-CH (2004) Molecular perspectives on p97–VCP:  
602 progress in understanding its structure and diverse biological functions. *J*  
603 *Struct Biol* 146(1–2):44–57.

- 604 3. Wolf DH, Stolz A (2012) The Cdc48 machine in endoplasmic reticulum  
605 associated protein degradation. *Biochim Biophys Acta BBA - Mol Cell Res*  
606 1823(1):117–124.
- 607 4. Verma R, Oania RS, Kolawa NJ, Deshaies RJ (2013) Cdc48/p97 promotes  
608 degradation of aberrant nascent polypeptides bound to the ribosome. *eLife*  
609 2:e00308.
- 610 5. Xu S, Peng G, Wang Y, Fang S, Karbowski M (2011) The AAA-ATPase p97  
611 is essential for outer mitochondrial membrane protein turnover. *Mol Biol Cell*  
612 22(3):291–300.
- 613 6. Defenouillere Q, et al. (2013) Cdc48-associated complex bound to 60S  
614 particles is required for the clearance of aberrant translation products. *Proc*  
615 *Natl Acad Sci* 110(13):5046–5051.
- 616 7. Rabouille C, Levine TP, Peters J-M, Warren G (1995) An NSF-like ATPase,  
617 p97, and NSF mediate cisternal regrowth from mitotic Golgi fragments. *Cell*  
618 82(6):905–914.
- 619 8. Ritz D, et al. (2011) Endolysosomal sorting of ubiquitylated caveolin-1 is  
620 regulated by VCP and UBXD1 and impaired by VCP disease mutations. *Nat*  
621 *Cell Biol* 13(9):1116–1123.
- 622 9. Ye Y (2006) Diverse functions with a common regulator: Ubiquitin takes  
623 command of an AAA ATPase. *J Struct Biol* 156(1):29–40.
- 624 10. Meyer H, Bug M, Bremer S (2012) Emerging functions of the VCP/p97 AAA-  
625 ATPase in the ubiquitin system. *Nat Cell Biol* 14(2):117–123.
- 626 11. Förster F, Schuller J, Unverdorben P, Aufderheide A (2014) Emerging  
627 Mechanistic Insights into AAA Complexes Regulating Proteasomal  
628 Degradation. *Biomolecules* 4(3):774–794.
- 629 12. Liu C -w., et al. (2002) Conformational Remodeling of Proteasomal  
630 Substrates by PA700, the 19 S Regulatory Complex of the 26 S  
631 Proteasome. *J Biol Chem* 277(30):26815–26820.
- 632 13. Weber-Ban EU, Reid BG, Miranker AD, Horwich AL (1999) Global unfolding  
633 of a substrate protein by the Hsp100 chaperone ClpA. *Nature*  
634 401(6748):90–93.
- 635 14. Gerega A, et al. (2005) VAT, the Thermoplasma Homolog of Mammalian  
636 p97/VCP, Is an N Domain-regulated Protein Unfoldase. *J Biol Chem*  
637 280(52):42856–42862.
- 638 15. Barthelme D, Sauer RT (2012) Identification of the Cdc48• 20S proteasome  
639 as an ancient AAA+ proteolytic machine. *Science* 337(6096):843–846.



- 640 16. DeLaBarre B, Brunger AT (2005) Nucleotide Dependent Motion and  
641 Mechanism of Action of p97/VCP. *J Mol Biol* 347(2):437–452.
- 642 17. Hänzelmann P, Schindelin H (2016) Structural Basis of ATP Hydrolysis and  
643 Intersubunit Signaling in the AAA+ ATPase p97. *Structure* 24(1):127–139.
- 644 18. Banerjee S, et al. (2016) 2.3 Å resolution cryo-EM structure of human p97  
645 and mechanism of allosteric inhibition. *Science* 351(6275):871–875.
- 646 19. Beskow A, et al. (2009) A Conserved Unfoldase Activity for the p97 AAA-  
647 ATPase in Proteasomal Degradation. *J Mol Biol* 394(4):732–746.
- 648 20. Chou T-F, et al. (2014) Specific Inhibition of p97/VCP ATPase and Kinetic  
649 Analysis Demonstrate Interaction between D1 and D2 ATPase Domains. *J*  
650 *Mol Biol* 426(15):2886–2899.
- 651 21. Wang Q, Song C, Li C-CH (2003) Hexamerization of p97-VCP is promoted  
652 by ATP binding to the D1 domain and required for ATPase and biological  
653 activities. *Biochem Biophys Res Commun* 300(2):253–260.
- 654 22. Briggs LC, et al. (2008) Analysis of Nucleotide Binding to P97 Reveals the  
655 Properties of a Tandem AAA Hexameric ATPase. *J Biol Chem*  
656 283(20):13745–13752.
- 657 23. Esaki M, Ogura T (2010) ATP-bound form of the D1 AAA domain inhibits an  
658 essential function of Cdc48p/p97 This paper is one of a selection of papers  
659 published in this special issue entitled 8th International Conference on AAA  
660 Proteins and has undergone the Journal's usual peer review process.  
661 *Biochem Cell Biol* 88(1):109–117.
- 662 24. Song C (2003) ATPase Activity of p97-Valosin-containing Protein (VCP). D2  
663 MEDIATES THE MAJOR ENZYME ACTIVITY, AND D1 CONTRIBUTES TO  
664 THE HEAT-INDUCED ACTIVITY. *J Biol Chem* 278(6):3648–3655.
- 665 25. Ye Y (2003) Function of the p97-Ufd1-Npl4 complex in retrotranslocation  
666 from the ER to the cytosol: dual recognition of nonubiquitinated polypeptide  
667 segments and polyubiquitin chains. *J Cell Biol* 162(1):71–84.
- 668 26. Davies JM, Brunger AT, Weis WI (2008) Improved Structures of Full-Length  
669 p97, an AAA ATPase: Implications for Mechanisms of Nucleotide-  
670 Dependent Conformational Change. *Structure* 16(5):715–726.
- 671 27. Nishikori S, Esaki M, Yamanaka K, Sugimoto S, Ogura T (2011) Positive  
672 Cooperativity of the p97 AAA ATPase Is Critical for Essential Functions. *J*  
673 *Biol Chem* 286(18):15815–15820.



- 674 28. Li G, Huang C, Zhao G, Lennarz WJ (2012) Interprotomer motion-  
675 transmission mechanism for the hexameric AAA ATPase p97. *Proc Natl*  
676 *Acad Sci* 109(10):3737–3741.
- 677 29. Yeung HO, et al. (2014) Inter-ring rotations of AAA ATPase p97 revealed by  
678 electron cryomicroscopy. *Open Biol* 4(3):130142–130142.
- 679 30. Schuller JM, Beck F, Lössl P, Heck AJR, Förster F (2016) Nucleotide-  
680 dependent conformational changes of the AAA+ ATPase p97 revisited.  
681 *FEBS Lett* 590(5):595–604.
- 682 31. Tang WK, Xia D (2016) Role of the D1-D2 Linker of Human VCP/p97 in the  
683 Asymmetry and ATPase Activity of the D1-domain. *Sci Rep* 6:20037.
- 684 32. Rouiller I, et al. (2002) Conformational changes of the multifunction p97 AAA  
685 ATPase during its ATPase cycle. *Nat Struct Biol* 9(12):950–957.
- 686 33. Hinnerwisch J, Fenton WA, Furtak KJ, Farr GW, Horwich AL (2005) Loops in  
687 the Central Channel of ClpA Chaperone Mediate Protein Binding, Unfolding,  
688 and Translocation. *Cell* 121(7):1029–1041.
- 689 34. DeLaBarre B, Christianson JC, Kopito RR, Brunger AT (2006) Central Pore  
690 Residues Mediate the p97/VCP Activity Required for ERAD. *Mol Cell*  
691 22(4):451–462.
- 692 35. Zhao M, et al. (2015) Mechanistic insights into the recycling machine of the  
693 SNARE complex. *Nature* 518(7537):61–67.
- 694 36. Schubert C, Buchberger A (2008) UBX domain proteins: major regulators  
695 of the AAA ATPase Cdc48/p97. *Cell Mol Life Sci* 65(15):2360–2371.
- 696 37. Alexandru G, et al. (2008) UBXD7 Binds Multiple Ubiquitin Ligases and  
697 Implicates p97 in HIF1 $\alpha$  Turnover. *Cell* 134(5):804–816.
- 698 38. Meyer HH, Kondo H, Warren G (1998) The p47 co-factor regulates the  
699 ATPase activity of the membrane fusion protein, p97. *FEBS Lett*  
700 437(3):255–257.
- 701 39. Bruderer RM, Brasseur C, Meyer HH (2004) The AAA ATPase p97/VCP  
702 Interacts with Its Alternative Co-factors, Ufd1-Npl4 and p47, through a  
703 Common Bipartite Binding Mechanism. *J Biol Chem* 279(48):49609–49616.
- 704 40. Zhang X, et al. (2015) Altered cofactor regulation with disease-associated  
705 p97/VCP mutations. *Proc Natl Acad Sci* 112(14):E1705–E1714.
- 706 41. Kondo H, et al. (1997) p47 is a cofactor for p97-mediated membrane fusion.  
707 *Nature* 388(6637):75–78.

- 708 42. Verma R, Oania R, Fang R, Smith GT, Deshaies RJ (2011) Cdc48/p97  
709 mediates UV-dependent turnover of RNA Pol II. *Mol Cell* 41(1):82–92.
- 710 43. Besten W den, Verma R, Kleiger G, Oania RS, Deshaies RJ (2012) NEDD8  
711 links cullin-RING ubiquitin ligase function to the p97 pathway. *Nat Struct Mol*  
712 *Biol* 19(5):511–516.
- 713 44. Raman M, et al. (2015) Systematic proteomics of the VCP–UBXD adaptor  
714 network identifies a role for UBXN10 in regulating ciliogenesis. *Nat Cell Biol*  
715 17(10):1356–1369.
- 716 45. Bays NW, Wilhovsky SK, Goradia A, Hodgkiss-Harlow K, Hampton RY  
717 (2001) HRD4/NPL4 is required for the proteasomal processing of  
718 ubiquitinated ER proteins. *Mol Biol Cell* 12(12):4114–4128.
- 719 46. Meyer HH, Shorter JG, Seemann J, Pappin D, Warren G (2000) A complex  
720 of mammalian Ufd1 and Npl4 links the AAA-ATPase, p97, to ubiquitin and  
721 nuclear transport pathways. *EMBO J* 19(10):2181–2192.
- 722 47. Johnson ES, Ma PC, Ota IM, Varshavsky A (1995) A proteolytic pathway  
723 that recognizes ubiquitin as a degradation signal. *J Biol Chem*  
724 270(29):17442–17456.
- 725 48. Meyer HH, Wang Y, Warren G (2002) Direct binding of ubiquitin conjugates  
726 by the mammalian p97 adaptor complexes, p47 and Ufd1–Npl4. *EMBO J*  
727 21(21):5645–5652.
- 728 49. Pye VE, et al. (2007) Structural insights into the p97-Ufd1-Npl4 complex.  
729 *Proc Natl Acad Sci* 104(2):467–472.
- 730 50. Isaacson RL, et al. (2007) Detailed Structural Insights into the p97-Npl4-  
731 Ufd1 Interface. *J Biol Chem* 282(29):21361–21369.
- 732 51. Bebeacua C, et al. (2012) Distinct conformations of the protein complex  
733 p97-Ufd1-Npl4 revealed by electron cryomicroscopy. *Proc Natl Acad Sci*  
734 109(4):1098–1103.
- 735 52. Hänzelmann P, Schindelin H (2016) Characterization of an Additional  
736 Binding Surface on the p97 N-Terminal Domain Involved in Bipartite  
737 Cofactor Interactions. *Structure* 24(1):140–147.
- 738 53. Watts GDJ, et al. (2004) Inclusion body myopathy associated with Paget  
739 disease of bone and frontotemporal dementia is caused by mutant valosin-  
740 containing protein. *Nat Genet* 36(4):377–381.
- 741 54. Tang WK, Xia D (2016) Mutations in the Human AAA+ Chaperone p97 and  
742 Related Diseases. *Front Mol Biosci* 3. doi:10.3389/fmolb.2016.00079.

- 743 55. Johnson JO, et al. (2010) Exome Sequencing Reveals VCP Mutations as a  
744 Cause of Familial ALS. *Neuron* 68(5):857–864.
- 745 56. Ju J-S, et al. (2009) Valosin-containing protein (VCP) is required for  
746 autophagy and is disrupted in VCP disease. *J Cell Biol* 187(6):875–888.
- 747 57. Tresse E, et al. (2010) VCP/p97 is essential for maturation of ubiquitin-  
748 containing autophagosomes and this function is impaired by mutations that  
749 cause IBMPFD. *Autophagy* 6(2):217–227.
- 750 58. Ramanathan HN, Ye Y (2012) The p97 ATPase associates with EEA1 to  
751 regulate the size of early endosomes. *Cell Res* 22(2):346–359.
- 752 59. Ching JK, et al. (2013) mTOR dysfunction contributes to vacuolar pathology  
753 and weakness in valosin-containing protein associated inclusion body  
754 myopathy. *Hum Mol Genet* 22(6):1167–1179.
- 755 60. Papadopoulos C, et al. (2017) VCP/p97 cooperates with YOD1, UBXD1 and  
756 PLAA to drive clearance of ruptured lysosomes by autophagy. *EMBO J*  
757 36(2):135–150.
- 758 61. Zhang T, Mishra P, Hay BA, Chan D, Guo M (2017) Valosin-containing  
759 protein (VCP/p97) inhibitors relieve Mitofusin-dependent mitochondrial  
760 defects due to VCP disease mutants. *eLife* 6:e17834.
- 761 62. Fernández-Sáiz V, Buchberger A (2010) Imbalances in p97 co-factor  
762 interactions in human proteinopathy. *EMBO Rep* 11(6):479–485.
- 763 63. Niwa H, et al. (2012) The Role of the N-Domain in the ATPase Activity of the  
764 Mammalian AAA ATPase p97/VCP. *J Biol Chem* 287(11):8561–8570.
- 765 64. Halawani D, et al. (2009) Hereditary Inclusion Body Myopathy-Linked  
766 p97/VCP Mutations in the NH2 Domain and the D1 Ring Modulate p97/VCP  
767 ATPase Activity and D2 Ring Conformation. *Mol Cell Biol* 29(16):4484–  
768 4494.
- 769 65. Tang WK, Xia D (2013) Altered Intersubunit Communication Is the Molecular  
770 Basis for Functional Defects of Pathogenic p97 Mutants. *J Biol Chem*  
771 288(51):36624–36635.
- 772 66. Tang WK, et al. (2010) A novel ATP-dependent conformation in p97 N-D1  
773 fragment revealed by crystal structures of disease-related mutants. *EMBO J*  
774 29(13):2217–2229.
- 775 67. Manno A, Noguchi M, Fukushi J, Motohashi Y, Kakizuka A (2010) Enhanced  
776 ATPase activities as a primary defect of mutant valosin-containing proteins  
777 that cause inclusion body myopathy associated with Paget disease of bone

- 778 and frontotemporal dementia: Enhanced ATPase activities in IBMPFD-  
779 VCPs. *Genes Cells*:no-no.
- 780 68. Ju JS, Weihl CC (2010) Inclusion body myopathy, Paget's disease of the  
781 bone and fronto-temporal dementia: a disorder of autophagy. *Hum Mol*  
782 *Genet* 19(R1):R38–R45.
- 783 69. Ritson GP, et al. (2010) TDP-43 Mediates Degeneration in a Novel  
784 *Drosophila* Model of Disease Caused by Mutations in VCP/p97. *J Neurosci*  
785 30(22):7729–7739.
- 786 70. Johnson ES, Bartel B, Seufert W, Varshavsky A (1992) Ubiquitin as a  
787 degradation signal. *EMBO J* 11(2):497.
- 788 71. Bachmair A, Finley D, Varshavsky A (1986) In vivo half-life of a protein is a  
789 function of its amino-terminal residue. *Science* 3018930(179):234.
- 790 72. Wójcik C, et al. (2006) Valosin-containing protein (p97) is a regulator of  
791 endoplasmic reticulum stress and of the degradation of N-end rule and  
792 ubiquitin-fusion degradation pathway substrates in mammalian cells. *Mol*  
793 *Biol Cell* 17(11):4606–4618.
- 794 73. Ballar P, Shen Y, Yang H, Fang S (2006) The Role of a Novel p97/Valosin-  
795 containing Protein-interacting Motif of gp78 in Endoplasmic Reticulum-  
796 associated Degradation. *J Biol Chem* 281(46):35359–35368.
- 797 74. Fang S, et al. (2001) The tumor autocrine motility factor receptor, gp78, is a  
798 ubiquitin protein ligase implicated in degradation from the endoplasmic  
799 reticulum. *Proc Natl Acad Sci* 98(25):14422–14427.
- 800 75. Thrower JS, Hoffman L, Rechsteiner M, Pickart CM (2000) Recognition of  
801 the polyubiquitin proteolytic signal. *EMBO J* 19(1):94–102.
- 802 76. Dong KC, et al. (2011) Preparation of Distinct Ubiquitin Chain Reagents of  
803 High Purity and Yield. *Structure* 19(8):1053–1063.
- 804 77. Martinez-Fonts K, Matouschek A (2016) A Rapid and Versatile Method for  
805 Generating Proteins with Defined Ubiquitin Chains. *Biochemistry (Mosc)*  
806 55(12):1898–1908.
- 807 78. Fenton WA, Kashi Y, Furtak K, Horwich AL (1994) Residues in chaperonin  
808 GroEL required for polypeptide binding and release. *Nature* 371(6498):614–  
809 619.
- 810 79. Bandau S, Knebel A, Gage ZO, Wood NT, Alexandru G (2012) UBXN7  
811 docks on neddylated cullin complexes using its UIM motif and causes HIF1 $\alpha$   
812 accumulation. *BMC Biol* 10(1):1.

- 813 80. Magnaghi P, et al. (2013) Covalent and allosteric inhibitors of the ATPase  
814 VCP/p97 induce cancer cell death. *Nat Chem Biol* 9(9):548–556.
- 815 81. Anderson DJ, et al. (2015) Targeting the AAA ATPase p97 as an Approach  
816 to Treat Cancer through Disruption of Protein Homeostasis. *Cancer Cell*  
817 28(5):653–665.
- 818 82. Dai RM, Li CC (2001) Valosin-containing protein is a multi-ubiquitin chain-  
819 targeting factor required in ubiquitin-proteasome degradation. *Nat Cell Biol*  
820 3(8):740–744.
- 821 83. Rothballer A, Tzvetkov N, Zwickl P (2007) Mutations in p97/VCP induce  
822 unfolding activity. *FEBS Lett* 581(6):1197–1201.
- 823 84. Barthelme D, Sauer RT (2013) Bipartite determinants mediate an  
824 evolutionarily conserved interaction between Cdc48 and the 20 S peptidase.  
825 *Proc Natl Acad Sci* 110(9):3327–3332.
- 826 85. Meyer H-J, Rape M (2014) Enhanced Protein Degradation by Branched  
827 Ubiquitin Chains. *Cell* 157(4):910–921.
- 828 86. Xu P, et al. (2009) Quantitative Proteomics Reveals the Function of  
829 Unconventional Ubiquitin Chains in Proteasomal Degradation. *Cell*  
830 137(1):133–145.
- 831 87. Zhang Z, et al. (2013) Ter94 ATPase Complex Targets K11-Linked  
832 Ubiquitinated Ci to Proteasomes for Partial Degradation. *Dev Cell*  
833 25(6):636–644.
- 834 88. Zhang Z, et al. (2015) The Transitional Endoplasmic Reticulum ATPase p97  
835 Regulates the Alternative Nuclear Factor NF- $\kappa$ B Signaling via Partial  
836 Degradation of the NF- $\kappa$ B Subunit p100. *J Biol Chem* 290(32):19558–19568.
- 837 89. Liu C, Liu W, Ye Y, Li W (2017) Ufd2p synthesizes branched ubiquitin  
838 chains to promote the degradation of substrates modified with atypical  
839 chains. *Nat Commun* 8:14274.
- 840 90. Ewens CA, et al. (2014) The p97-FAF1 Protein Complex Reveals a  
841 Common Mode of p97 Adaptor Binding. *J Biol Chem* 289(17):12077–12084.
- 842 91. Hanzelmann P, Schindelin H (2011) The Structural and Functional Basis of  
843 the p97/Valosin-containing Protein (VCP)-interacting Motif (VIM):  
844 MUTUALLY EXCLUSIVE BINDING OF COFACTORS TO THE N-  
845 TERMINAL DOMAIN OF p97. *J Biol Chem* 286(44):38679–38690.
- 846 92. Schuberth C, Buchberger A (2005) Membrane-bound Ubx2 recruits Cdc48  
847 to ubiquitin ligases and their substrates to ensure efficient ER-associated  
848 protein degradation. *Nat Cell Biol* 7(10):999–1006.

- 849 93. Beuron F, et al. (2006) Conformational changes in the AAA ATPase p97-  
850 p47 adaptor complex. *EMBO J* 25(9):1967–1976.
- 851 94. Song C, Wang Q, Song C, Rogers TJ (2015) Valosin-containing protein  
852 (VCP/p97) is capable of unfolding polyubiquitinated proteins through its  
853 ATPase domains. *Biochem Biophys Res Commun* 463(3):453–457.
- 854 95. Thoms S (2002) Cdc48 can distinguish between native and non-native  
855 proteins in the absence of cofactors. *FEBS Lett* 520(1):107–110.
- 856 96. Chang Y-C, et al. (2011) Pathogenic VCP/TER94 Alleles Are Dominant  
857 Actives and Contribute to Neurodegeneration by Altering Cellular ATP Level  
858 in a Drosophila IBMPFD Model. *PLoS Genet* 7(2):e1001288.
- 859 97. Shorter J (2017) Designer protein disaggregases to counter  
860 neurodegenerative disease. *Curr Opin Genet Dev* 44:1–8.

861

862

## 863 **Table and Figure Legends**

864

### 865 **Table 1. Rates and extents of unfolding of <sup>UbL</sup>Ub-<sup>UbL</sup>Ub-GFP by p97 mutants.**

866 The rates and plateaus were calculated by fitting data to a single exponential  
867 decay, with the plateau representing the percent of fluorescence remaining at the  
868 end of the reaction. Unpaired t-tests comparing WT rates to those of p97-E305Q  
869 and p97-A232E yielded p-values of <0.0001 in both cases, indicating statistically  
870 significant differences. Sample size represents number of technical replicates,  
871 and values are shown ± S.D.

872

873 **Fig. 1. Substrate design and synthesis.** (A) Preassembled, K48-linked Ub<sub>3</sub>  
874 chains containing a K48R mutation on the distal ubiquitin were ligated onto a  
875 non-cleavable linear His<sub>6</sub>-Ub-GFP fusion protein to produce pure <sup>Ub<sub>3</sub></sup>Ub-GFP. (B)  
876 E1, E2, ubiquitin, and ATP were added to His<sub>6</sub>-Ub-GFP to elongate K48-linked  
877 ubiquitin chains of varying length on the ubiquitin fused to GFP. These resulting  
878 substrates were purified from free ubiquitin chains via Ni-NTA resin and crudely  
879 fractionated according to chain length via size exclusion chromatography to  
880 produce pools of “long,” “medium,” and “short” chain substrates (<sup>UbL</sup>Ub-GFP,



881  $^{UbM}$ Ub-GFP, and  $^{UbS}$ Ub-GFP, respectively). (C) To produce branched chains, Ub  
882 chains of varying length were enzymatically elongated on a di- or tri-ubiquitin  
883 linear fusion protein, Ub-Ub-GFP or Ub-Ub-Ub-GFP, similar to (B). (D) Size  
884 exclusion chromatogram and corresponding SDS-PAGE gel for the purification of  
885 substrate described in (B).

886

887 **Fig. 2. p97 unfolds Ub-GFP in a UN-dependent manner** (A) SDS-PAGE  
888 analysis of GFP substrates with different Ub chain structures stained with  
889 Coomassie. (B) Upon addition of ATP, 75 nM p97, 150 nM UN, and 250 nM  
890 GroEL, 25 nM Ub-GFP and  $^{Ub3}$ Ub-GFP did not appreciably lose fluorescence  
891 over time. However, Ub-GFP with “medium” or “long” K48-linked chains ( $^{UbM}$ Ub-  
892 GFP and  $^{UbL}$ Ub-GFP) exhibited 26% and 32% loss of signal after 15 minutes,  
893 respectively. Representative traces shown,  $n \geq 3$ . (C) Fluorescence of  $^{UbL}$ Ub-GFP  
894 did not change over time with the addition of p97, GroEL, or p97 plus GroEL.  
895 Upon addition of p97 plus UN, a small decrease in signal was observed, and this  
896 decrease was augmented with the addition of GroEL. Representative traces  
897 shown,  $n \geq 2$ . (D)  $^{UbL}$ Ub-GFP co-immunoprecipitated with GroEL only in the  
898 presence of p97 and UN.

899

900 **Fig. 3. Branched Ub chains are better p97 substrates.** (A) SDS-PAGE  
901 analysis of Ub-GFP substrates stained with Coomassie. (B) Comparison of  
902 unfolding of substrates with one, two or three ubiquitins fused in tandem to GFP.  
903 Note that substrate with two linearly fused ubiquitins (e.g.  $^{UbM}$ Ub- $^{UbM}$ Ub-GFP)  
904 was unfolded to a greater extent by p97 than substrate with a single linearly-  
905 fused ubiquitin, even though aggregate ubiquitination for the latter substrate was  
906 at least as extensive or greater than the former. Adding an additional linearly-  
907 fused ubiquitin ( $^{UbL}$ Ub- $^{UbL}$ Ub- $^{UbL}$ Ub-GFP) yielded no further improvement.  
908 Representative traces shown,  $n \geq 3$ .

909

910 **Fig. 4. ATPase activity of p97 is critical for and stimulated by substrate**  
911 **unfolding.** (A) Fluorescence traces of  $^{UbL}$ Ub- $^{UbL}$ Ub-GFP in the presence of p97,



912 UN, GroEL, and various nucleotides and p97 inhibitors. Unfolding was observed  
913 only in the presence of ATP. Representative traces shown,  $n \geq 2$ . (B) Unfolding of  
914  $^{UbL}Ub-^{UbL}Ub-GFP$  by p97 ATPase mutants. p97-E305Q and p97-E578Q are  
915 deficient in D1 and D2 ATPase activity, respectively. p97-E305Q was able to  
916 unfold substrate whereas p97-E578Q was not. Representative traces shown,  
917  $n \geq 3$ . (C) Substrate stimulates ATPase activity of p97 when UN is present. Both  
918 unanchored Ub chains and those linked to Ub-GFP yielded equivalent  
919 stimulation, while Ub-GFP and  $^{Ub3}Ub-GFP$  did not stimulate. ATPase activity was  
920 measured with BioMol Green as described in Methods and was normalized to  
921 basal WT p97 activity. Error bars represent S.D. with  $n=4$ . (D) Effect of substrate  
922 plus UN on ATPase activity of D1 and D2 domain ATPase mutants. Addition of  
923  $^{UbL}Ub-^{UbL}Ub-GFP$  plus UN slightly decreased ATPase activities of both D1  
924 mutant E305Q and D2 mutant E578Q. Error bars represent S.D. with  $n=4$ .

925

926 **Fig. 5. UN recruits ubiquitylated substrate to p97.** (A) Association of substrate  
927 with p97 depends on UN. Reactions containing 100 nM p97, 200 nM UN, 200 nM  
928  $^{UbL}Ub-^{UbL}Ub-GFP$  and/or 200 nM GroEL were immunoprecipitated using an anti-  
929 p97 antibody and assessed by western blot. Substrate was pulled down with p97  
930 only in the presence of UN, and substrate enhanced the binding of UN to p97.  
931 Effects of substrate and UN on binding of GroEL to p97 could not be determined  
932 due to high background binding of GroEL to beads, antibody and/or p97. (B) UN  
933 binds directly to substrate and links it to p97. Samples prepared as in (A) were  
934 immunoprecipitated with an anti-GFP antibody. Substrate pulled down UN but  
935 only bound p97 in the presence of UN. (C) Bound nucleotide has only a modest  
936 effect on formation of a p97•UN•substrate ternary complex. Samples prepared as  
937 in (A) with various nucleotides and/or p97 inhibitors were immunoprecipitated by  
938 anti-FLAG resin, which bound the FLAG-tagged Ub on substrate. Binding of p97,  
939 but not UN, was reduced only in the ADP state.

940

941 **Fig. 6. IMBPFDF mutant p97-A232E is a better unfoldase.** (A) In the presence  
942 of UN and GroEL, p97-A232E catalyzed the loss of fluorescence of  $^{UbL}Ub-^{UbL}Ub-$

943 GFP faster than wild-type, suggesting it acts as an improved unfoldase. Rates  
944 are listed in Table 1 and the difference between WT and p97-A232E is  
945 statistically significant with  $p < 0.0001$ . Representative traces shown,  $n \geq 3$ . (B)  
946 p97-A232E shows accelerated ATPase rates in the presence of UN and  
947 substrate. The IBMPFD mutant also had both a higher baseline ATPase rate  
948 than WT (unpaired t-test,  $p < 0.0001$ ) and a higher ATPase activity in the presence  
949 of UN and substrate compared to WT (unpaired t-test,  $p = 0.0003$ ). ATPase  
950 activity was measured with BioMol Green as described in Methods was  
951 normalized to basal WT p97 activity. Error bars represent S.D. with  $n = 4$ . (C)  
952 Addition of a 37.5 nM CB-5083 restores p97-A232E unfoldase activity to WT  
953 levels. Representative traces shown,  $n = 2$ , and the difference between WT and  
954 p97-A232E rates is statistically significant (unpaired t-test,  $p = 0.02$ ). Independent  
955 preparations of proteins were used for panels (A) and (C).

| <b>Mutant</b> | <b>Rate (s<sup>-1</sup>)</b> | <b>Plateau (%)</b> | <b>n</b> |
|---------------|------------------------------|--------------------|----------|
| WT            | 0.195 ± 0.007                | 33.3 ± 0.8         | 6        |
| E305Q         | 0.154 ± 0.005                | 36.5 ± 0.8         | 3        |
| E578Q         | N.D.                         | N.D.               | 3        |
| A232E         | 0.274 ± 0.007                | 25.3 ± 0.4         | 3        |

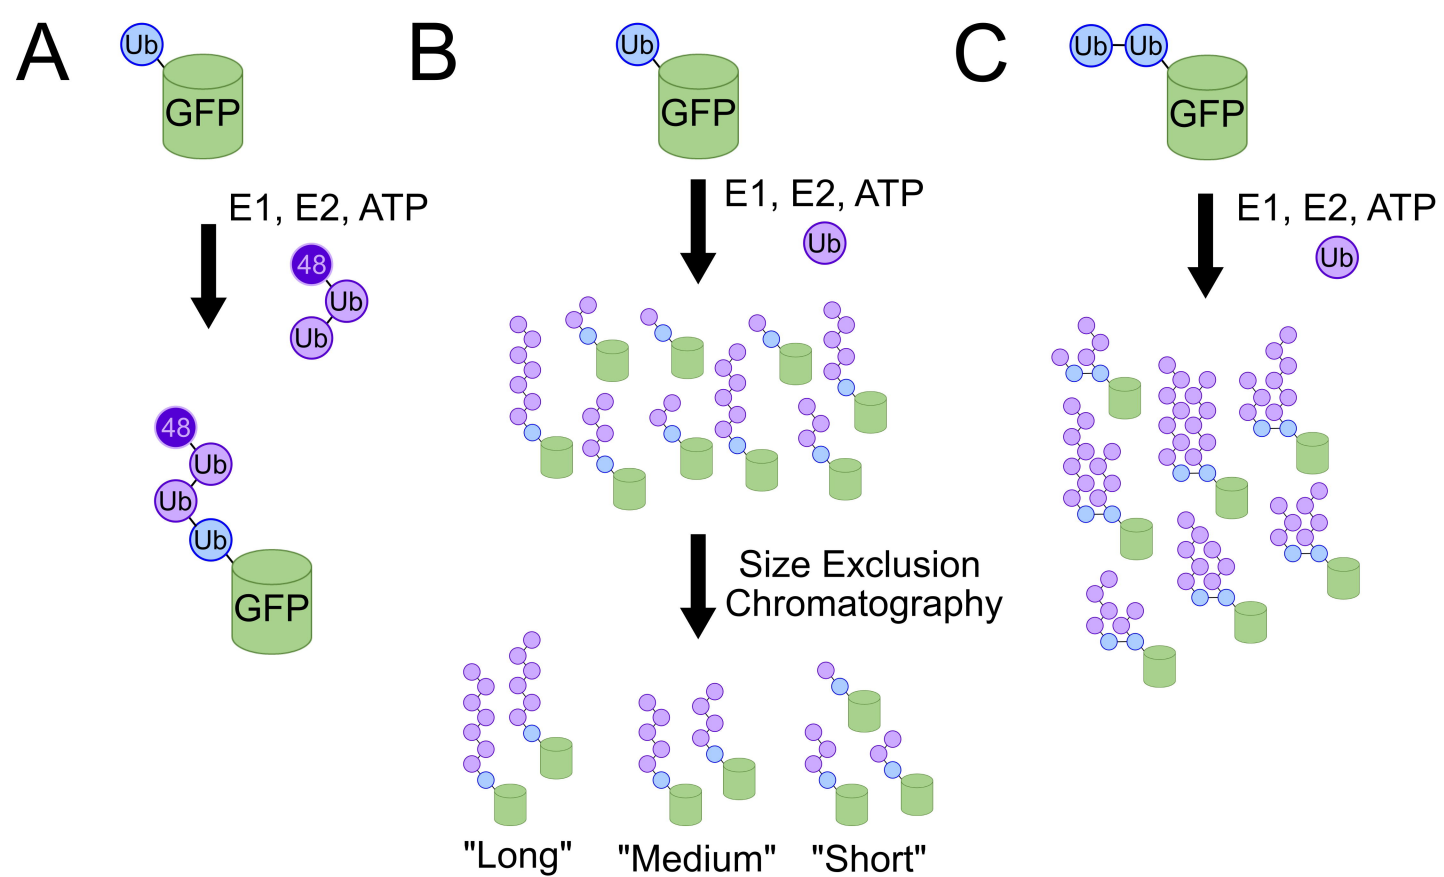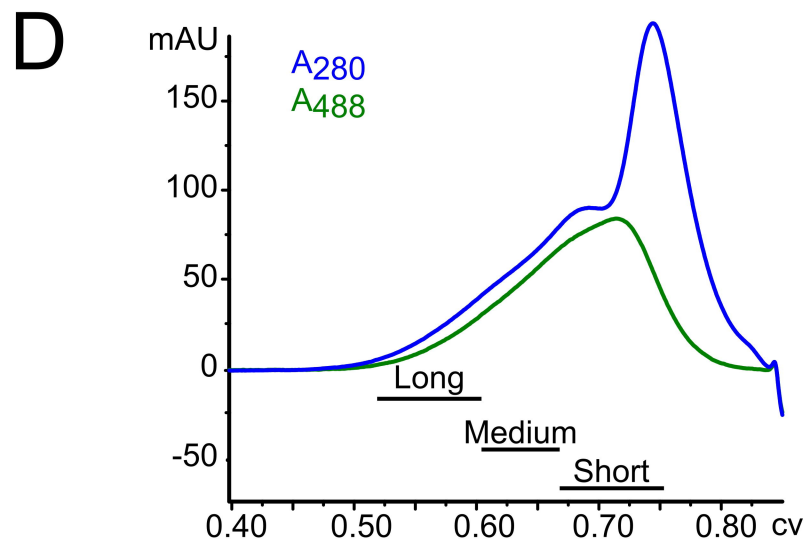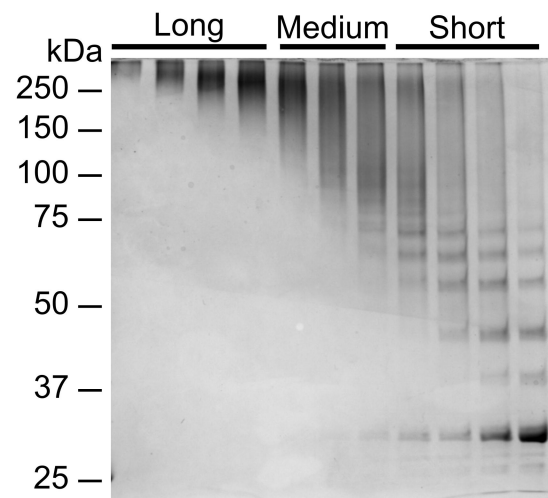

**A**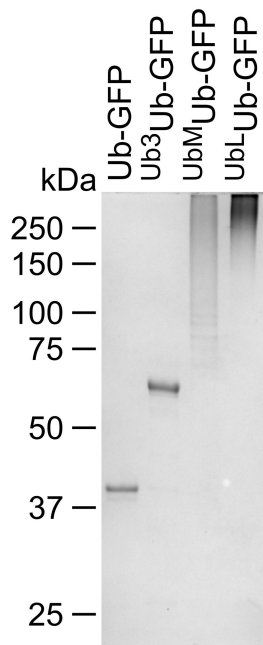**B**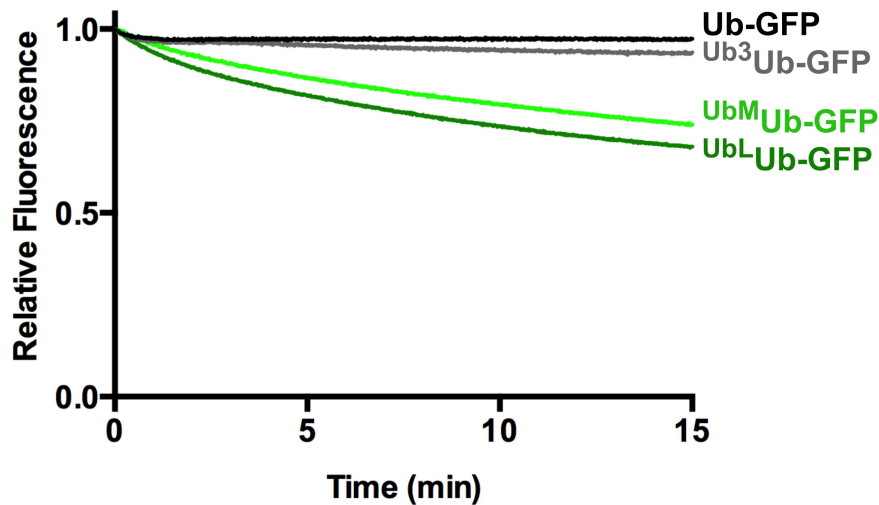**C**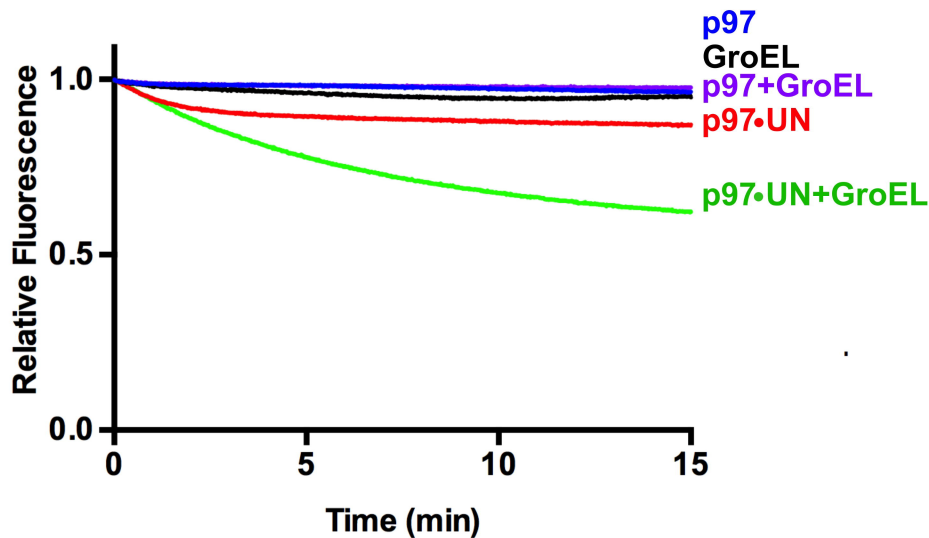**D**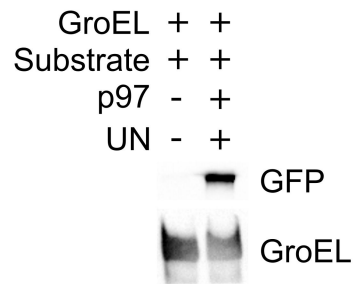

**A**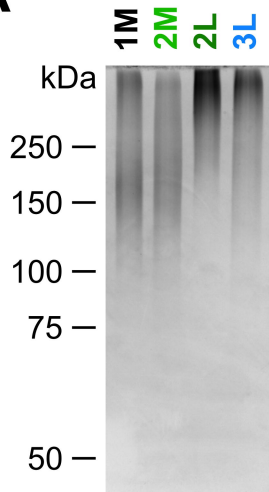

1M = Ub<sup>M</sup>Ub-GFP

2M = Ub<sup>M</sup>Ub-Ub<sup>M</sup>Ub-GFP

2L = Ub<sup>L</sup>Ub-Ub<sup>L</sup>Ub-GFP

3L = Ub<sup>L</sup>Ub-Ub<sup>L</sup>Ub-Ub<sup>L</sup>Ub-GFP

**B**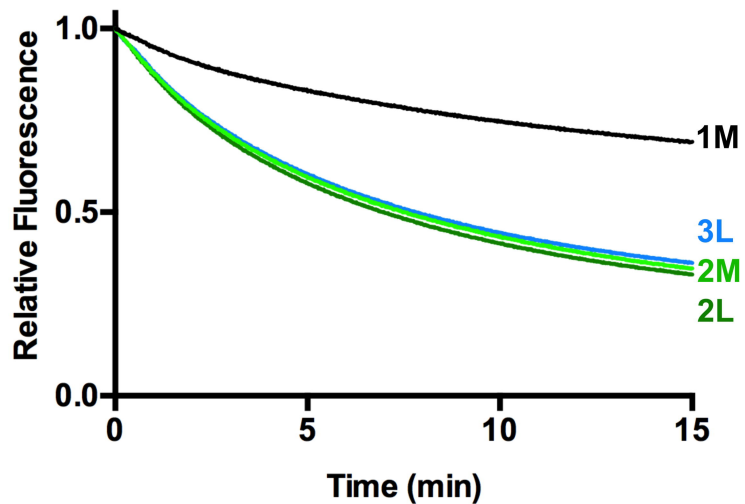

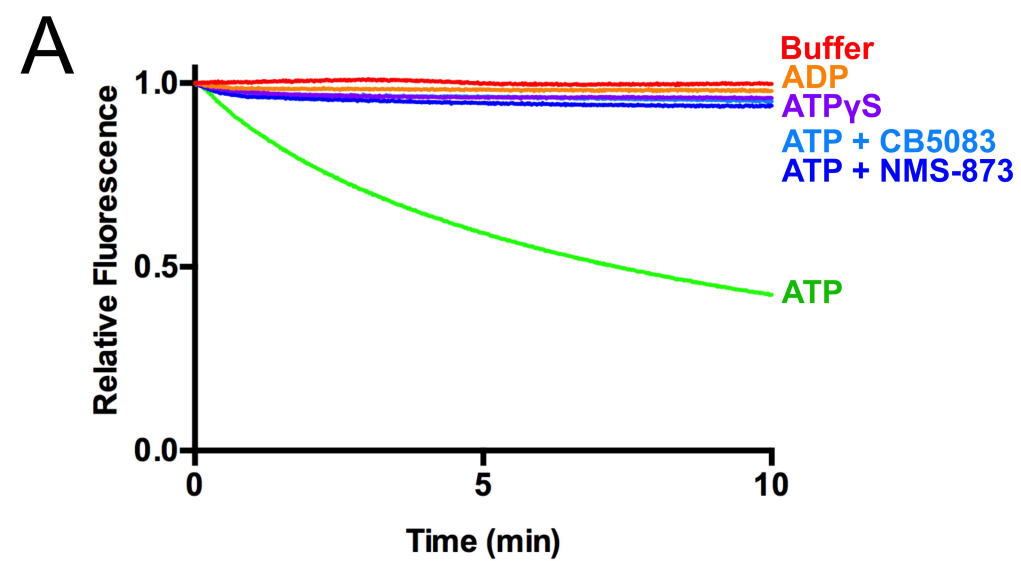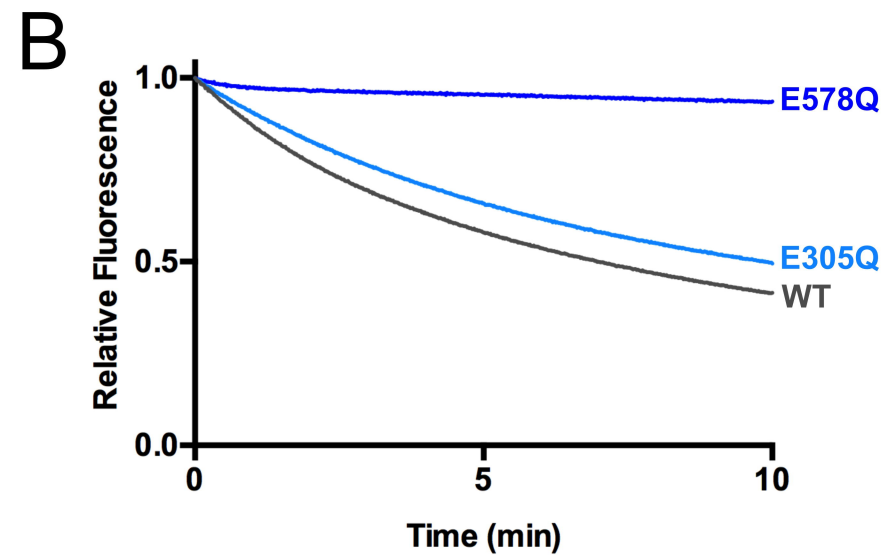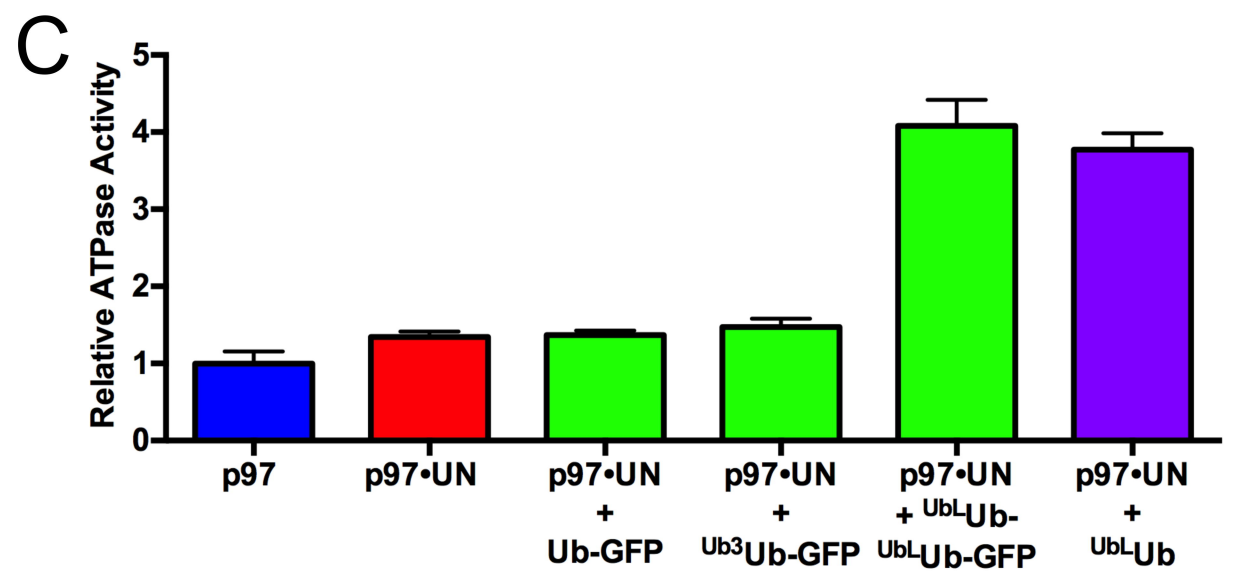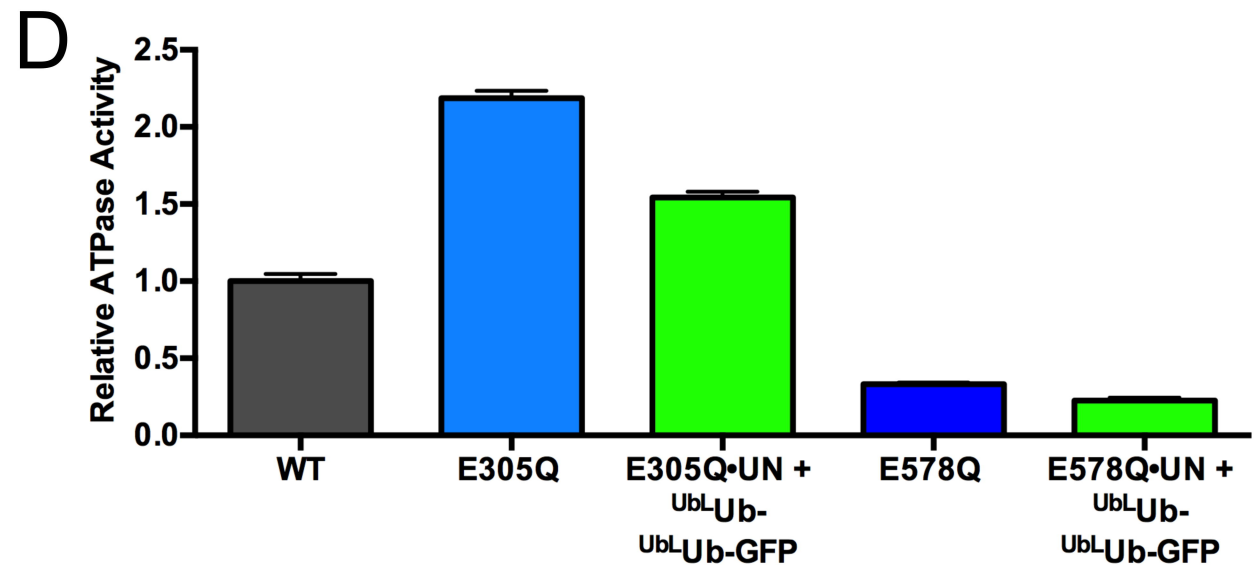



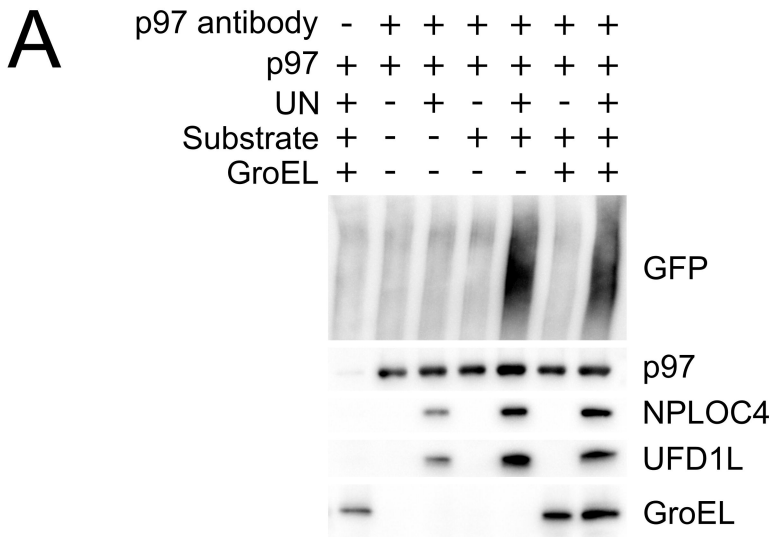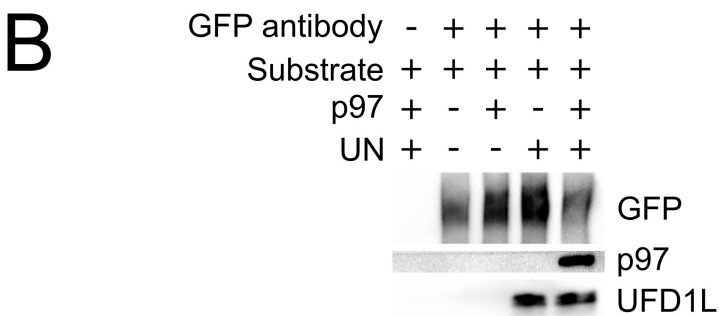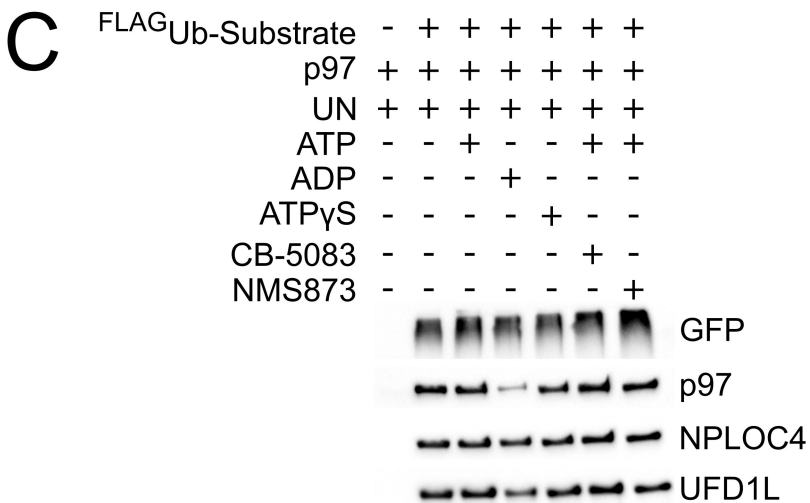

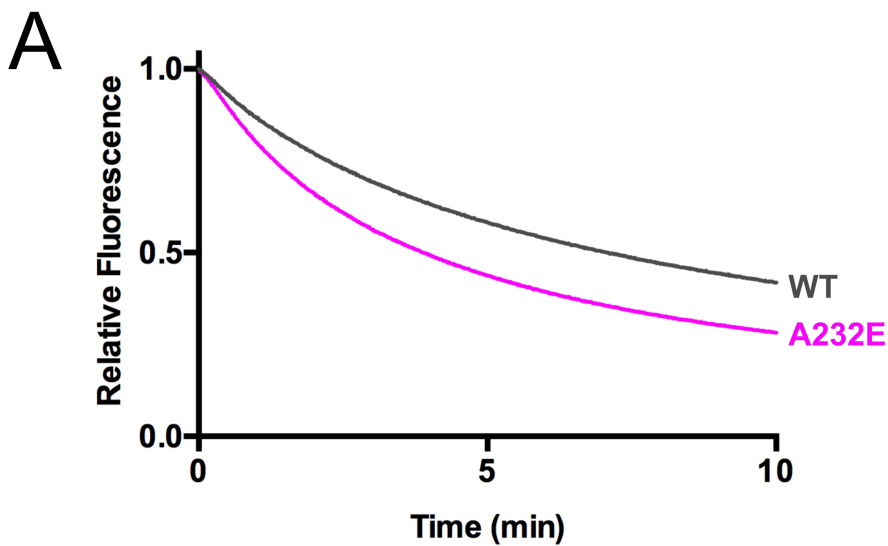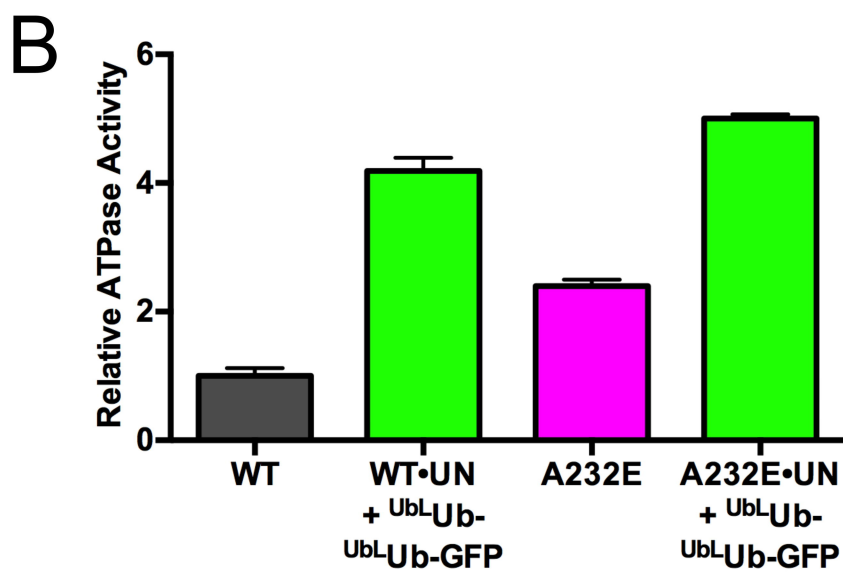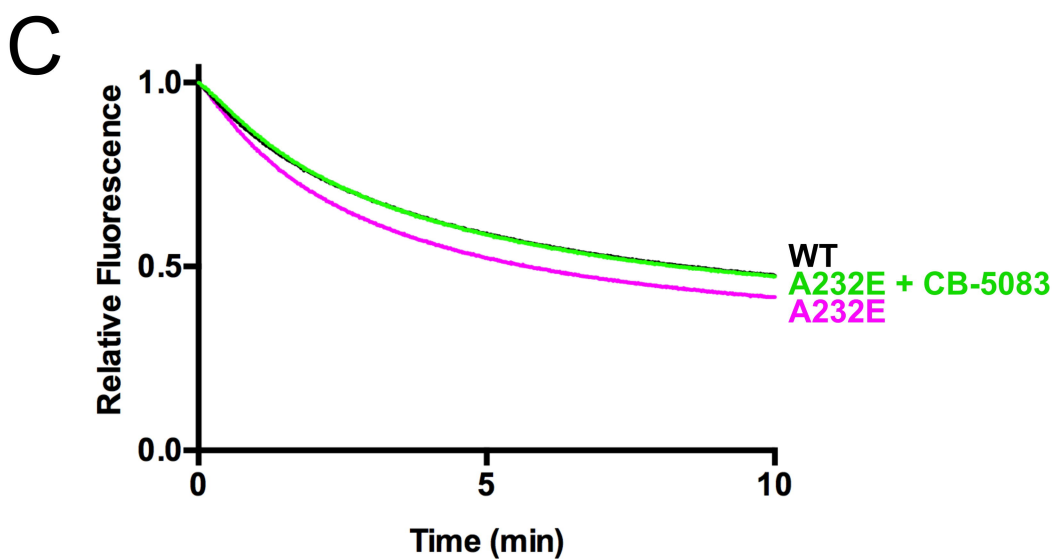

Source: http://biorxiv.org/content/10.1101/129528v1.full.pdf
